# Supplementary material for: Microemulsions for the covalent patterning of graphene
Source: Royal Society of Chemistry journal article supplement (doi:10.1039/d2cc01858f), 2022-01-01
Supplement: d2cc01858f1.pdf [file d2cc01858f1.pdf]

## Supplementary information: Microemulsions for the Covalent Patterning of Graphene

Alicia Naranjo, Natalia Martín Sabanés, Manuel Vázquez Sulleiro and Emilio M. Pérez

### Section 1. Methods

**Chemical reagents:** Mineral oil (O) BioReagent, for molecular biology and Tween 80 (T80) were bought from Sigma Aldrich. 4-bromobenzenediazonium tetrafluoroborate (diazonium salt) was bought from TCI. Graphene were purchased from Graphenea (on SiO<sub>2</sub> substrate), and used as received.

**Instrumentation:** Raman measurements and optical images were performed using a commercial confocal Raman microscope (Senterra II, Bruker). Raman maps of variable size or individual Raman spectra were acquired using 532 nm wavelength, 5 second acquisition, 2 coacquisitions, 9-15 cm<sup>-1</sup> resolution using a 50X Olympus objective. MEMs and reagents were measured using 20 mW while for graphene substrates 2 mW was used.

DLS experiments were carried out on a Zetasizer Nano ZS at 25 °C to characterize droplet sizes. Refractive indexes of 1.47 (oil) and 1.33 (water) were used as acquisition parameter. Cryo-SEM measurements were performed in SEM Zeiss Gemini 500.

**Synthesis and characterization of microemulsions:** Emulsions, EMs, were synthesized by dispersing an aqueous phase (AP, prepared by mixing 1.8 g of distilled water and 0.5 g of T80 under stirring for 10 minutes at 80 °C) into an oily phase (OP, consisting of 0.15 g of mineral oil) by using a pump with a rate of 1mL/min under vigorous stirring for 30 minutes at 80 °C. This was followed by 45 minutes of sonication at r.t. to homogenize the samples and achieve the microscale droplet size, MEMs. For the patterning MEMs, used for patterned graphene (see next subsection), diazonium salt was added to the MEM after the sonication step, raising a final concentration of 4 mM in the water phase (2mg in 1.8 mL). In the case of small drop MEMs, water amount was increased to 4.2 g and the same synthetic procedure was followed.

Solubility experiments of the diazonium salt were carried out in the different solvents (aqueous and oily phases). In the case of aqueous phase (water and T80), little amounts of the organic compound were dissolved with sonication for 2 minutes, until reaching the saturation point (80 mg in 1 mL). To measure the solubility of the salt in oil, 80 mg were dispersed in 1 mL of oil and sonicated for 2 minutes. Then, the dispersion was filtered and 72.7 mg of the diazonium salt were recovered, resulting in a solubility in oil around 7 mg/mL.

To characterize blank and patterning MEMs, they were drop-casted into a glass slide and measured directly in the Raman spectrometer (Figures S4 and S5). For DLS measurements, liquid MEM solution was measured directly as prepared. Cryo-SEM studies were performed by dropping 10 µL of MEM into the cryo-SEM substrate and freeze it by submerging the sample on liquid N<sub>2</sub>. The sample was then sublimated for 20 minutes and sputtered with platinum for 70 seconds and measured afterwards.

**Sample preparation:** Preparation of graphene substrates was carried out by submerging the graphene substrate on diazonium salt aqueous solution (f-G) or Salt MEM (patterned or p-G, salt-MEM preparation described in previous subsection), respectively, for 5 minutes. Diazonium salt aqueous solution was prepared by dissolving 5.6 mg of diazonium salt in 5 mL of distilled water (4 mM, main manuscript Figure 4b) or 5.6 mg in 50 mL of distilled water (0.4 mM, low concentration control experiment, section 6 Figure S8). After submersion, substrates were dried on filtering paper and washed several times by submerging them in water. Finally, substrates were dried by N<sub>2</sub> flux. Raman of p-G and f-G samples was measured right after the drying step. Pristine substrate (pr-G, main manuscript Figure 4a) was measured as received.

## Section 2. Solubility experiments.

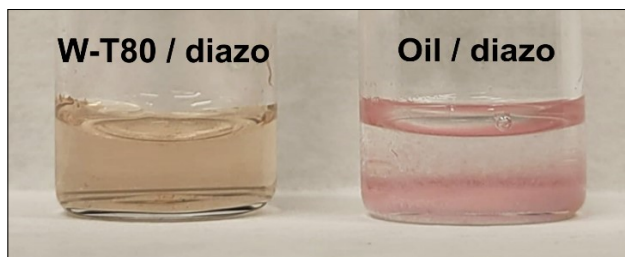

Figures S1. Vials containing salt dispersion. Left vial corresponds to a solution in aqueous phase (same ratio of water-surfactant used in emulsion preparation); vial on the right side shows the salt dispersion in oil phase (precipitated is clearly observed in the bottom of the vial).

## Section 3. Cryo-SEM characterization

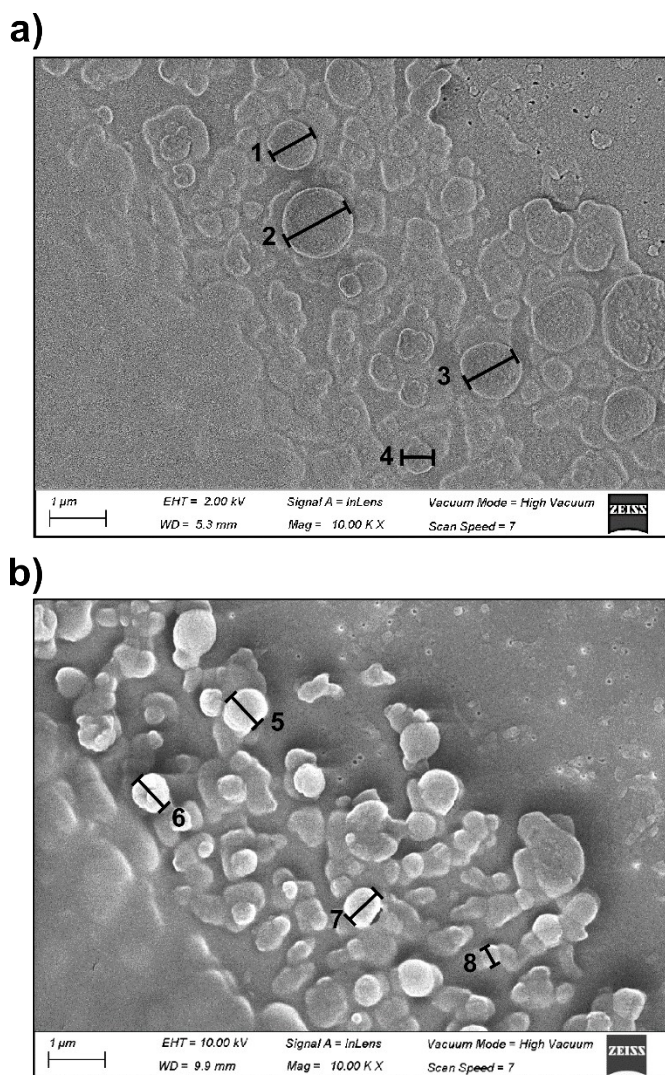

Figure S2. a) and b) Cryo-SEM images of different areas found on a blank MEM. Representative droplets of 500 to 1000 nm are marked. The droplet size distribution fits the results obtained by DLS and shown in Figure 2 of main manuscript.

## Section 4. Raman characterization of MEMs

As detailed in the main manuscript, MEMs are prepared by mixing an oily phase (composed of mineral oil) with an aqueous phase (composed of distilled water and the T80 surfactant). Raman spectra of the mineral oil and the T80 surfactant before using them in the dispersion are included in Figure S3 and are consistent with the spectral characterization provided by the manufacturer

of both chemicals [1]-[2]. Both spectra show bands in the same region, being the main difference between them the mode at  $1654\text{ cm}^{-1}$  in the T80 spectra, which is absent in the mineral oil (Figure S3 a and b). Further differences are appreciated in the region around  $1300\text{ cm}^{-1}$ , where the mineral oil presents a main peak at  $1302\text{ cm}^{-1}$  with a shoulder at  $1356\text{ cm}^{-1}$  while the T80 has a broader main peak at  $1297\text{ cm}^{-1}$  with a shoulder at  $1245\text{ cm}^{-1}$ , again consistent with the reference spectra provided by the manufacturer. The broad peak in the  $2800\text{ cm}^{-1}$  region also shows a difference shape between T80 and mineral oil. All those spectral signatures can be evaluated to assign phases in the MEMs characterization below.

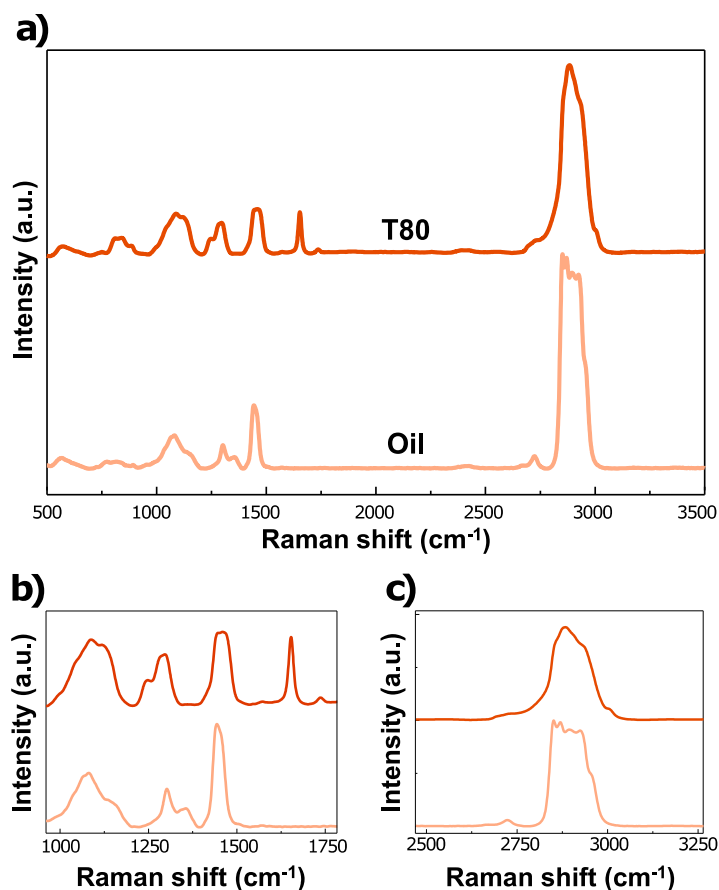

Figure S3. a) Raman spectra of T80 (dark orange) and oil (light orange); b) and c) detailed Raman data of the  $1300\text{ cm}^{-1}$  and  $2800\text{ cm}^{-1}$  regions.

Figure S4 and S5 contain optical images (a) and Raman map (b) of a blank MEM dispersion and a patterning MEM dispersion, respectively, by drop-casting the sample in a glass slide. Detailed Raman spectra of the blue and orange areas (inside and outside of the optically visible droplets, respectively) are included in Figure S4 and S5 d-f. Following the discussion in the previous paragraph, the orange spectrum is assigned to the aqueous phase containing T80 surfactant, due to the presence of a strong mode at  $1654\text{ cm}^{-1}$ . Similarly, the blue spectrum corresponds to the mineral oil used for the oily phase. The small changes in relative intensity and position of the bands in the  $500\text{--}1500\text{ cm}^{-1}$  spectral region also confirm this assignment when comparing with the reference spectra. Based on these results, the dispersion is composed of oil droplets surrounded by the aqueous phase (as schematically depicted in Figures S4 and S5 c). Note that the blue spectrum also shows a weak band at  $1654\text{ cm}^{-1}$  (Figure S4e and S5e) characteristic from the T80 surfactant. Raman experiments of the MEMs are performed in wet conditions and the laser focus has a volume so the observed weak signal on the droplets can be assigned to residual aqueous phase in planes above and below the observed one in the optical images.

The Raman spectra of the aqueous phase in the patterning MEMs (Figure S5, orange line), do not shown any characteristic modes of the diazonium salt. This is likely due to the strong signals of the T80 surfactant covering the weak signals of the diazonium molecules (note that the content of diazonium molecules into the aqueous phase is small in comparison with the T80 surfactant making impossible the detection of the salt). However, diazonium is not soluble in oil (as shown on Figure S1), so we can conclude that the salt is only present on the aqueous phase, i.e. outside the droplets in Figure S5.

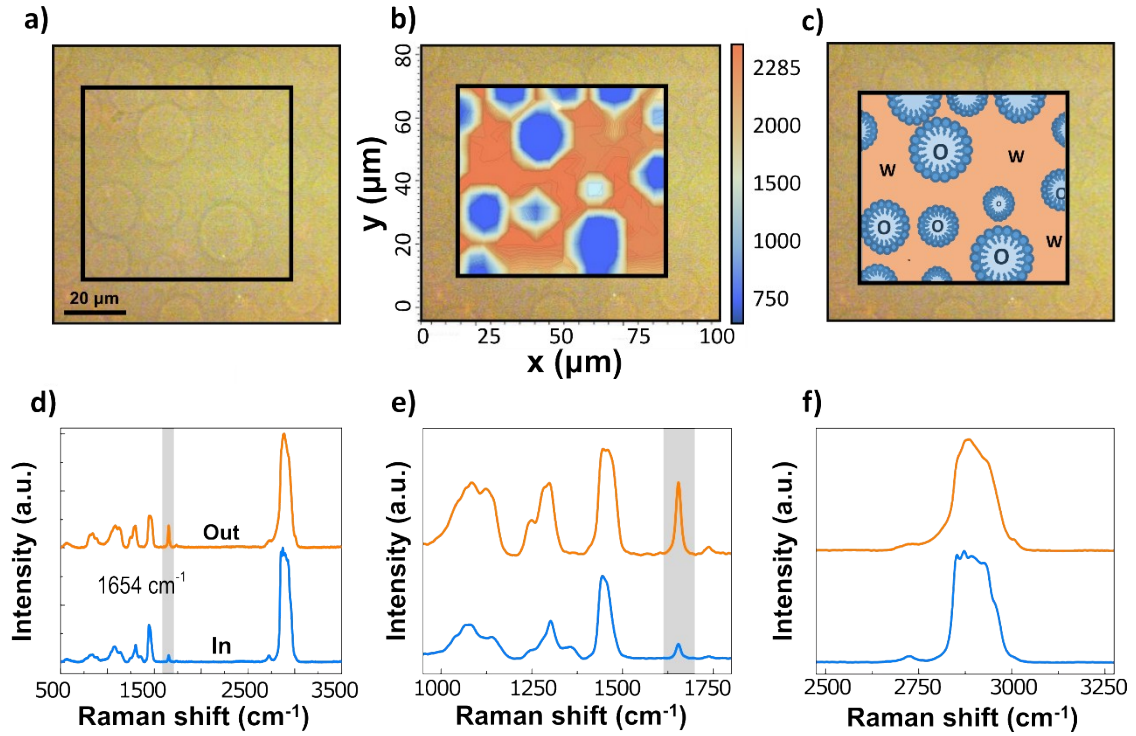

Figure S4. Blank MEM deposited on a glass slide: a) Optical image b) Raman mapping fitting optical image; c) scheme of the composition assigning oil and aqueous phase; d) Raman data of blue and orange areas in the map; e and f) detail of the main bands in the 1500 and 2885  $\text{cm}^{-1}$  spectral regions.

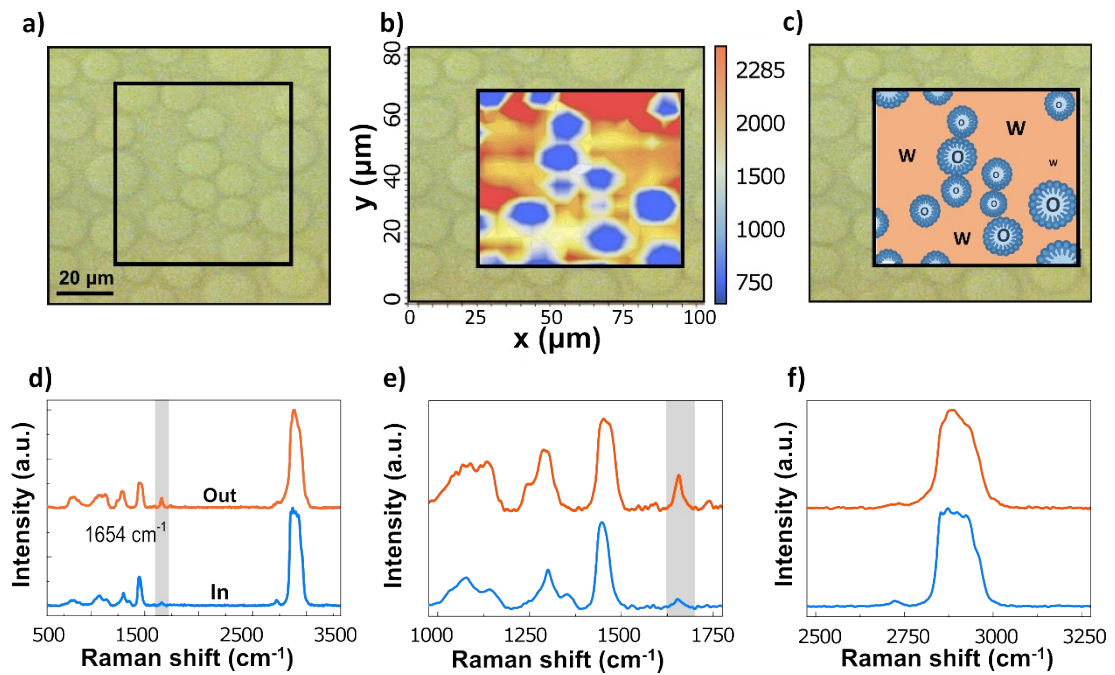

Figure S5. Patterning MEM deposited on a glass slide: a) Optical image; b) Raman mapping, fitting optical image; c) scheme of the composition assigning oil and aqueous phase; d) Raman data of blue and orange areas; e and f) detail of the main bands in the 1500 and 2885  $\text{cm}^{-1}$  spectral regions.

## Section 5. Detail of Raman spectra shown in Figure 4d

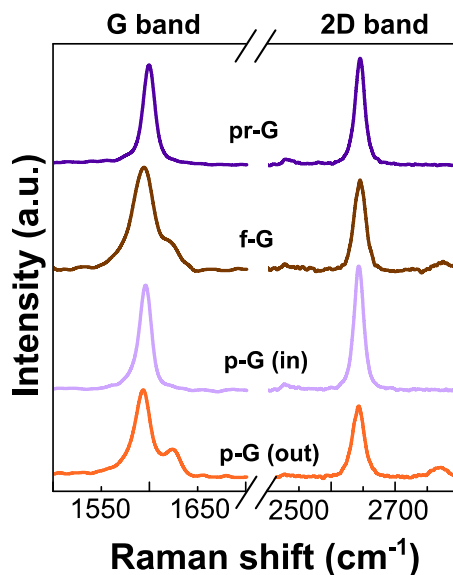

Figure S6. Magnification of the G and 2D band areas from Fig. 4d.

## Section 6. Raman of pristine and fully functionalized graphene substrates:

Figure S7 shows an optical image (a) of the pristine graphene substrates. Darker spots in the images as well as irregular lines are assigned to defects and cracks in the purchased substrates. This assignment is confirmed by analysing Raman spectra in the clean (light blue) versus defect regions (dark blue) since the later shows an increase of the defect-induced D band, absent in the

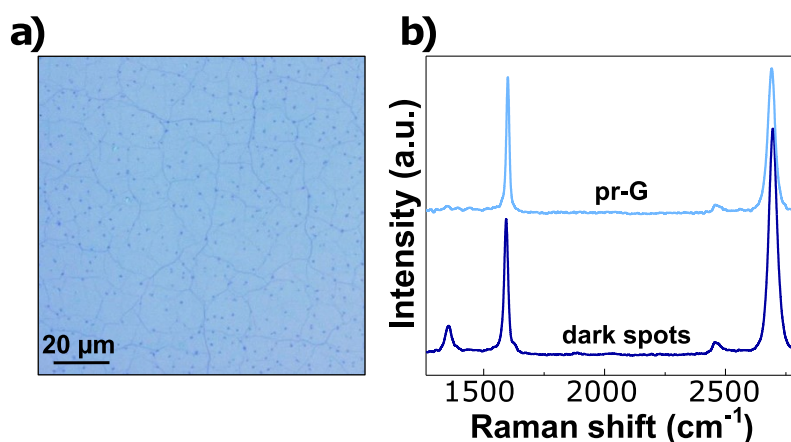

case of the clean substrate.

Figure S7. a) Optical image of the purchased graphene substrates; b) Raman data of clean areas and spots presented on substrates (blue light and dark spectra, respectively).

Similarly, the Raman map of the fully functionalized substrate (f-G) in Figure 4b of main manuscript shows spots with lower functionalization. These regions correspond to the defects in the graphene substrate, as obvious from the comparison shown in Figure S8, where the lighter regions in the Raman maps (Figure S8 a and c) are located at the darker spots (defects) in the micrographs (Figure S8 b and d).



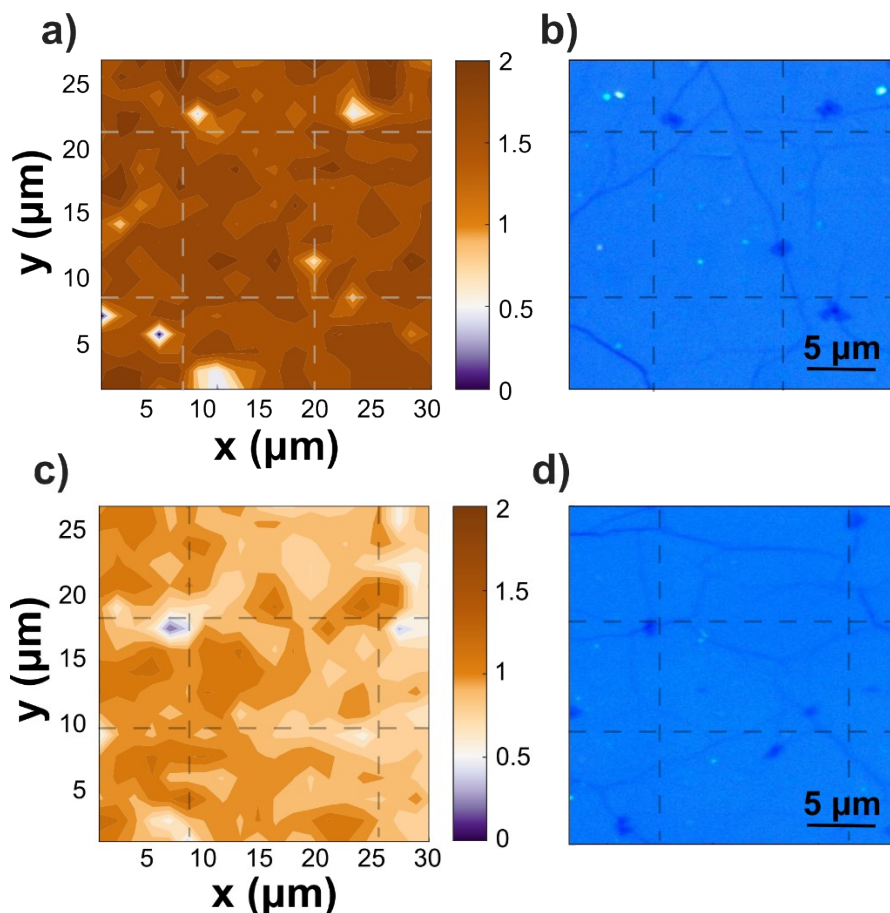

Figure S8. Control experiment for f-G substrates at different concentrations: a) 4 mM and c) 0.4 mM; b) and d) correspond to the optical images of the substrates, respectively. Dashed lines are guides to the eyes for easy comparison between Raman map and optical micrograph.

Decreasing the concentration by an order of magnitude (from 4 mM to 0.4 mM) in the salt solution used to prepare the fully functionalized samples resulted in the same qualitative behavior: homogeneous functionalization of the whole substrate (except for defects) with no patterning, and just a lower overall functionalization for lower salt concentrations.

#### Section 7. Raman of patterned graphene substrates:

Figure S9 contains the statistical distribution of intensity ratios (right, black histogram) of the  $I_D/I_G$  map shown on the left (same as Figure 4c in the main manuscript). The histogram can be adjusted by fitting a sum of 3 gaussian functions (total fit depicted in the figure in grey with the individual contributions in purple, light, and dark orange). These 3 populations within the total distribution can be assigned to the purple, light, and dark orange regions on the Raman map. The maximum of the gaussian distributions recovered from the fitting are indicated in the graph. The intensity of the gaussians matches the color distribution observed in the Raman map, with a majority of spectra showing a light orange tone, with a medium functionalization, and smaller areas in dark purple (low functionalization) and dark orange (high functionalization).

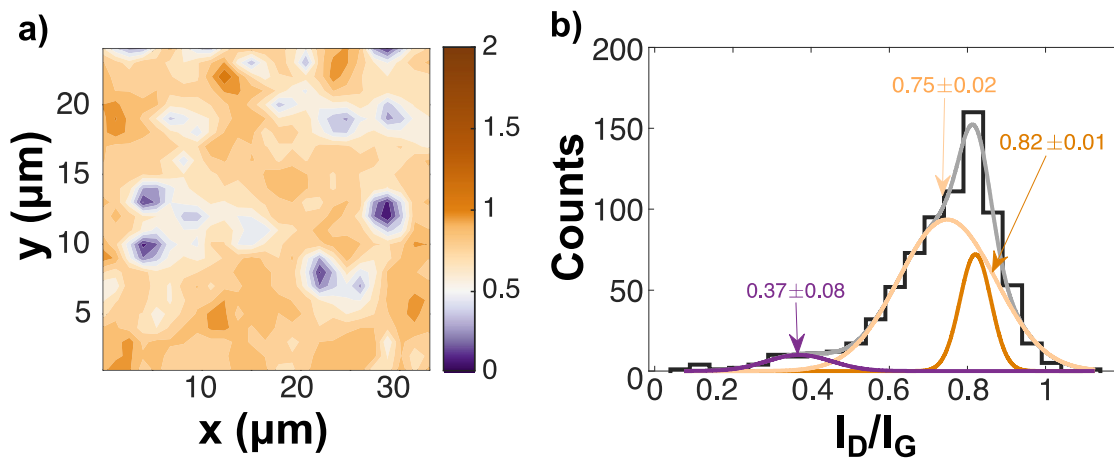

Figure S9. (a) Raman map of the  $I_D/I_G$  ratio for the patterned sample (same as Figure 4c in the main manuscript). (b) Distribution of intensity ratios (black histogram) corresponding to the Raman map in a. Purple, light orange and dark orange lines correspond to gaussian fits of the histogram, and are assigned to the dark purple, light orange and dark orange areas in the Raman map (the values of the gaussians' center are indicated in the figure with color arrows). The grey line is the total fit (sum of the 3 coloured gaussians).

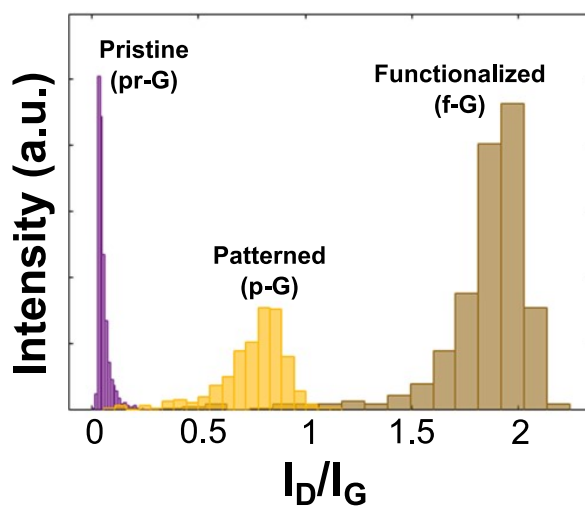

Figure S10:  $I_D/I_G$  ratio histograms corresponding to the Raman maps in the main manuscript Figure 4 a to c for the pristine pr-G (purple), fully functionalized f-G (brown) and patterned p-G (yellow) samples.

## Section 8. Tuning patterning process- Proof of concept:

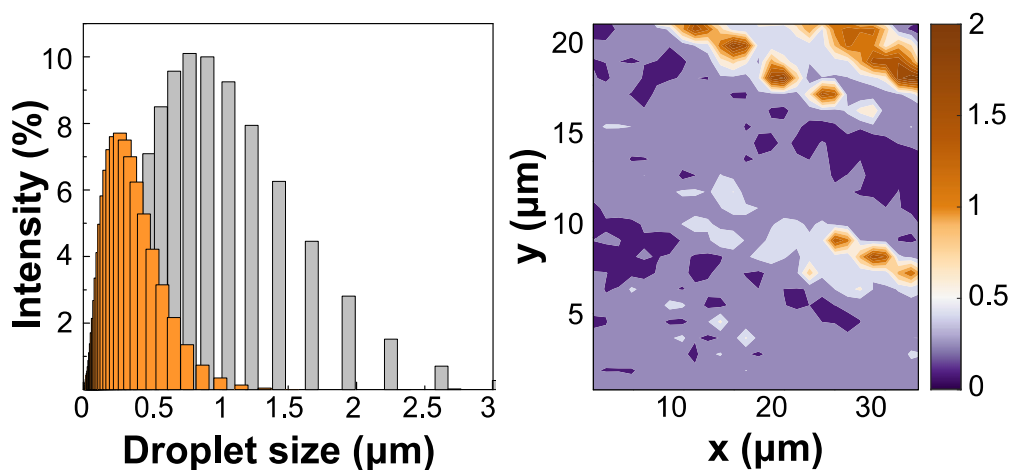

Figure S11. Left image: DLS data from MEMs (grey bars) and small drop MEMs (orange bars); right image: Raman mapping of the patterning performed with small drop MEMs, showing spherical areas with functionalization.

## Notes and references

[1]<https://www.sigmaaldrich.com/deepweb/assets/sigmaaldrich/quality/spectra/383/674/RAIR002220.pdf>

[2]<https://www.sigmaaldrich.com/deepweb/assets/sigmaaldrich/quality/spectra/240/875/RAIR006615.pdf>
